# Supplementary material for: Complexation of trivalent metal cations (Al3+, Ga3+, In3+, La3+, Lu3+) to cucurbiturils: a DFT/SMD evaluation of the key factors governing the host–guest recognition
Source: Royal Society of Chemistry journal article supplement (doi:10.1039/d1cp04585g), 2022-01-01
Supplement: d1cp04585g1.pdf [file d1cp04585g1.pdf]

## Supporting information

### Complexation of trivalent metal cations ( $\text{Al}^{3+}$ , $\text{Ga}^{3+}$ , $\text{In}^{3+}$ , $\text{La}^{3+}$ , $\text{Lu}^{3+}$ ) to cucurbiturils: a DFT/SMD evaluation of the key factors governing the host-guest recognition

Iskra Z. Koleva,<sup>a</sup> Stefan Dobrev,<sup>b</sup> Nikoleta Kircheva,<sup>b</sup> Lyubima Dasheva,<sup>a</sup> Valya Nikolova,<sup>a</sup>  
Silvia Angelova\*<sup>b</sup> and Todor Dudev\*<sup>a</sup>

<sup>a</sup> Faculty of Chemistry and Pharmacy, Sofia University "St. Kl. Ohridski", 1164 Sofia, Bulgaria

<sup>b</sup> Institute of Optical Materials and Technologies "Acad. J. Malinowski", Bulgarian Academy of Sciences, 1113 Sofia, Bulgaria

#### Additional data

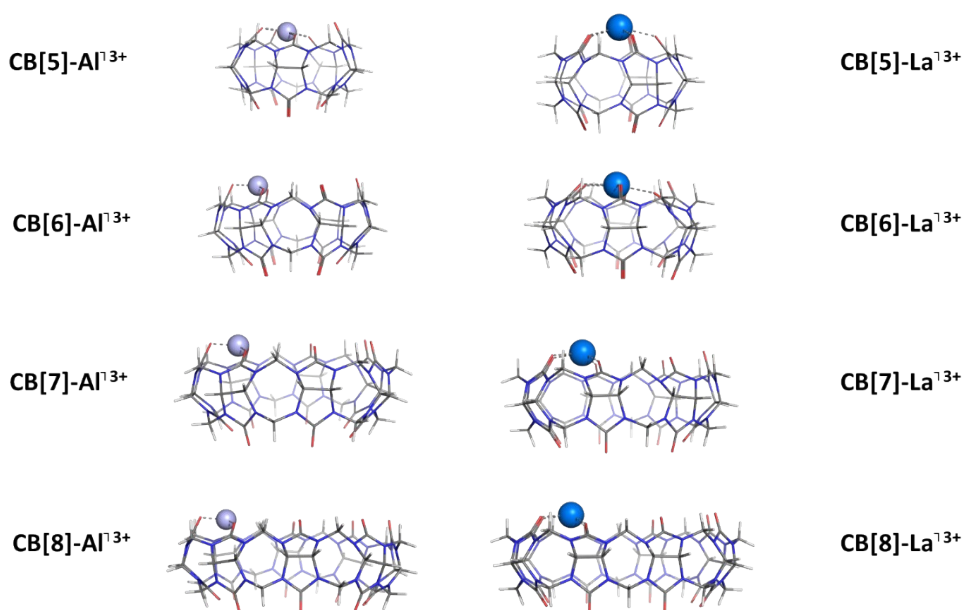

**Figure S1.** Optimized geometries of the  $\text{CB}[n]$ ,  $n = 5-8$ , complexes with bare  $\text{Al}^{3+}$  and  $\text{La}^{3+}$  cations (side view).

**Table S1.** CB[n]O-M distances and mean CB[n]O-M distances (Å).

| CB[5]-Al <sup>3+</sup> | CB[6]-Al <sup>3+</sup> | CB[7]-Al <sup>3+</sup> | CB[8]-Al <sup>3+</sup> | CB[5]-La <sup>3+</sup> | CB[6]-La <sup>3+</sup> | CB[7]-La <sup>3+</sup> | CB[8]-La <sup>3+</sup> |
|------------------------|------------------------|------------------------|------------------------|------------------------|------------------------|------------------------|------------------------|
| 1.819                  | 1.718                  | 1.720                  | 1.719                  | 2.409                  | 2.532                  | 2.352                  | 2.363                  |
| 1.856                  | 1.756                  | 1.756                  | 1.755                  | 2.403                  | 2.438                  | 2.356                  | 2.358                  |
| 1.857                  | 1.718                  | 1.720                  | 1.718                  | 2.406                  | 2.606                  | 2.357                  | 2.358                  |
| 1.820                  | 1.73                   | 1.73                   | 1.73                   | 2.409                  | 2.458                  | 2.352                  | 2.363                  |
| 1.84                   |                        |                        |                        | 2.406                  | 2.506                  | 2.35                   | 2.36                   |
|                        |                        |                        |                        | 2.41                   | 2.51                   |                        |                        |

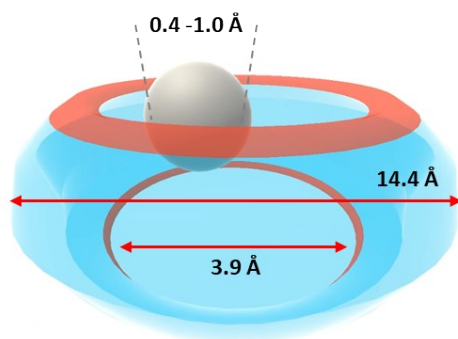

**Figure S2.** CB[6]/trivalent metal cations proportions. The relative ionic radii of Al<sup>3+</sup>, Ga<sup>3+</sup>, In<sup>3+</sup>, La<sup>3+</sup> and Lu<sup>3+</sup> for cations in complexes with tetrahedral (Al, Ga and In) and octahedral (La and Lu) surroundings are listed in Table 3.

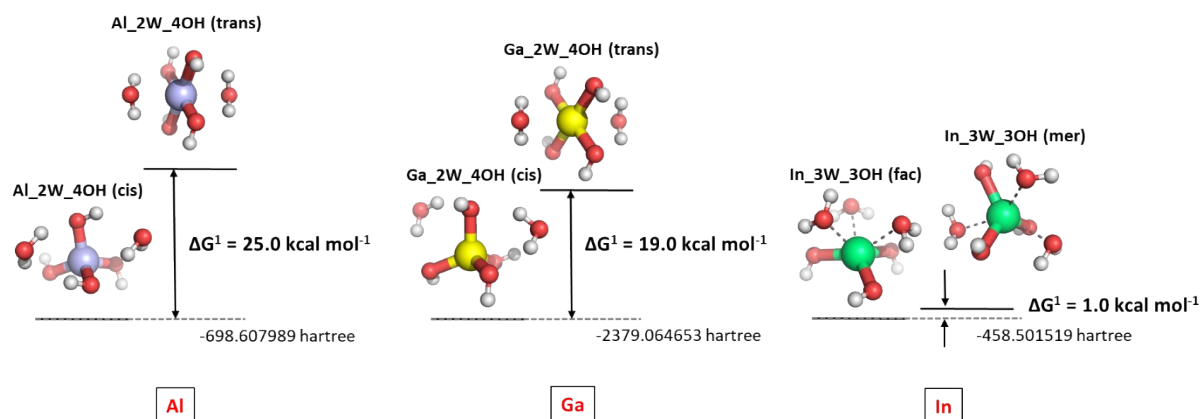

**Figure S3.** Optimized geometries of the hydrated metal cations Al<sup>3+</sup>, Ga<sup>3+</sup> and In<sup>3+</sup> at neutral pH (pH≈7). The relative stability of the hydrated species in the gas phase,  $\Delta G^1$ , is also given.

**Table S2.** Complex formation reactions between CB[6] and bare/hydrated  $M^{3+}$  cations, in kcal mol<sup>-1</sup>.

| Reaction                                                                | $\Delta G^1$ | $\Delta G^{78}$ |
|-------------------------------------------------------------------------|--------------|-----------------|
| $CB[6] + Al^{3+} \rightarrow CB[6]-Al^{13+}$                            | -723.0       | -355.2          |
| $CB[6] + Ga^{3+} \rightarrow CB[6]-Ga^{13+}$                            | -727.7       | -252.3          |
| $CB[6] + In^{3+} \rightarrow CB[6]-In^{13+}$                            | -529.7       | -33.8           |
| $CB[6] + La^{3+} \rightarrow CB[6]-La^{13+}$                            | -449.2       | 59.0            |
| $CB[6] + Lu^{3+} \rightarrow CB[6]-Lu^{13+}$                            | -503.6       | -2.5            |
| $CB[6] + Al(H_2O)_6^{13+} \rightarrow CB[6]-Al(H_2O)_6^{13+}$           | -257.8       | -32.7           |
| $CB[6] + Ga(H_2O)_6^{13+} \rightarrow CB[6]-Ga(H_2O)_6^{13+}$           | -281.7       | -33.7           |
| $CB[6] + In(H_2O)_6^{13+} \rightarrow CB[6]-In(H_2O)_6^{13+}$           | -217.4       | -11.8           |
| $CB[6] + La(H_2O)_8^{13+} \rightarrow CB[6]-La(H_2O)_8^{13+}$           | -172.1       | 4.5             |
| $CB[6] + La(H_2O)_9^{13+} \rightarrow CB[6]-La(H_2O)_9^{13+}$           | -178.4       | -11.7           |
| $CB[6] + Lu(H_2O)_8^{13+} \rightarrow CB[6]-Lu(H_2O)_8^{13+}$           | -187.7       | -2.2            |
| $CB[6] + Al(OH)_4(H_2O)_2^{1-} \rightarrow CB[6]-Al(OH)_4(H_2O)_2^{1-}$ | -13.9        | 8.3             |
| $CB[6] + Ga(OH)_4(H_2O)_2^{1-} \rightarrow CB[6]-Ga(OH)_4(H_2O)_2^{1-}$ | -26.9        | 3.6             |
| $CB[6] + In(OH)_3(H_2O)_3^{10} \rightarrow CB[6]-In(OH)_3(H_2O)_3^{10}$ | -11.5        | 13.7            |

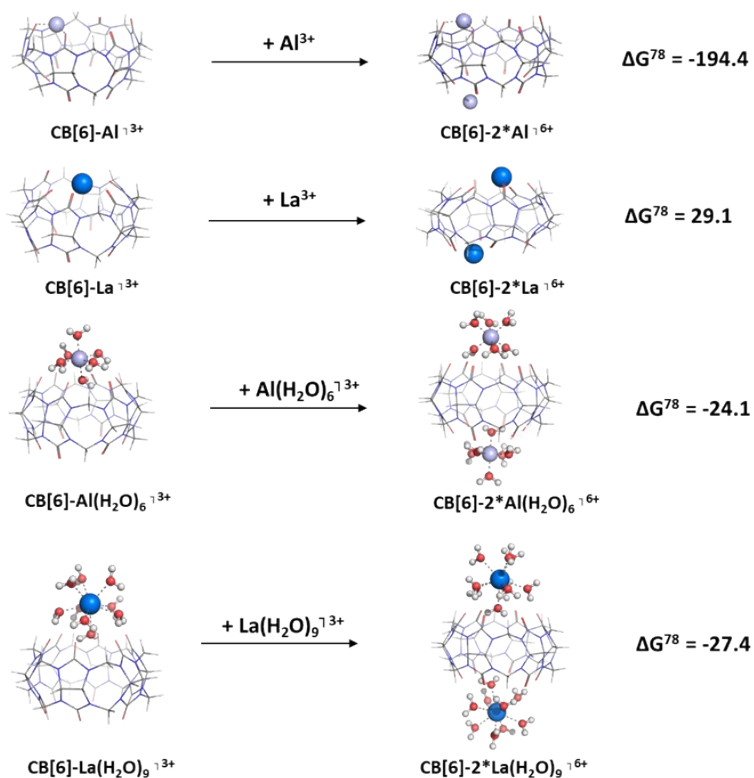

**Figure S4.** Optimized structures of complexes with 1:2 ligand-metal stoichiometry: CB[6]-2\*Al, CB[6]-2\*La, CB[6]-2\*Al(H<sub>2</sub>O)<sub>6</sub>, CB[6]-2\*La(H<sub>2</sub>O)<sub>9</sub>. The calculated Gibbs energies for complex formation in

water  $\Delta G^{78}$  are in kcal mol<sup>-1</sup>. The presence of second positively charged particle (M<sup>3+</sup>) in the complex inflicts repulsive ion-ion interactions affecting both geometry and thermodynamics of the construct.

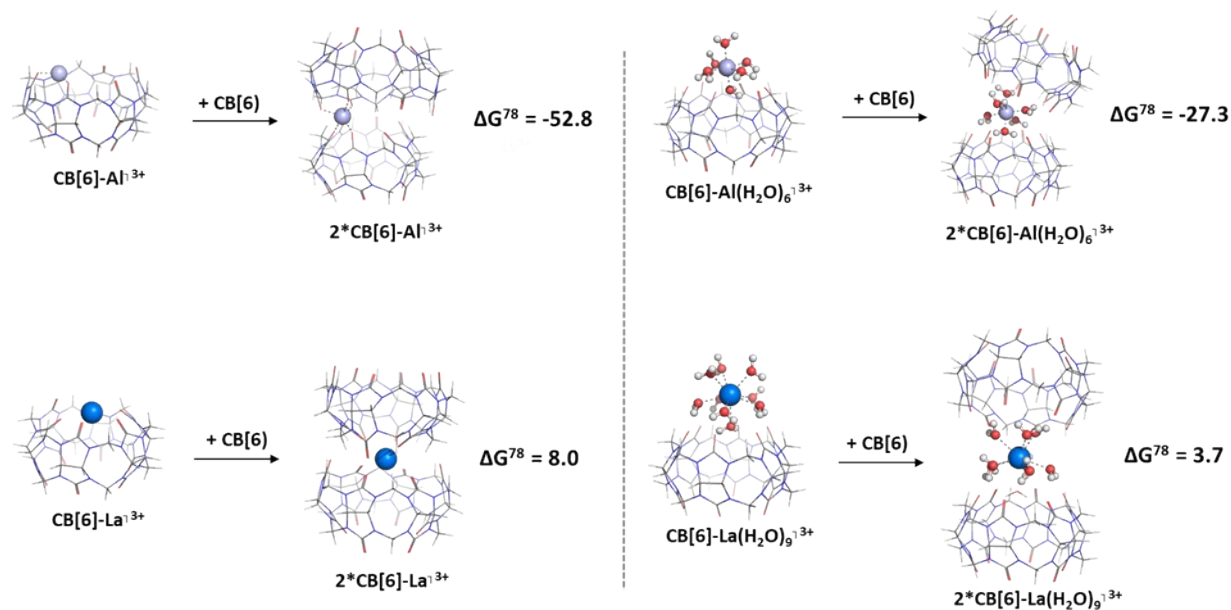

**Figure S5.** Optimized structures of complexes with 2:1 ligand-metal stoichiometry: 2\*CB[6]-Al, 2\*CB[6]-La, 2\*CB[6]-Al(H<sub>2</sub>O)<sub>6</sub> and 2\*CB[6]-La(H<sub>2</sub>O)<sub>9</sub>. The calculated Gibbs energies for complex formation in water  $\Delta G^{78}$  are in kcal mol<sup>-1</sup>.
